# Supplementary material for: Changes of Main Nutrient Components and Volatile Flavor Substances in Processing of Canned Bamboo Shoots
Source: MDPI journal article supplement (doi:10.3390/fermentation7040293), 2021-12-01
Supplement: s1 [file s1]

Table S1 Relative odor activity value of bamboo shoots and soaking solution

| Classification | Compounds                                     | RT     | CAS           | Threshold<br>value | ROAV  |       |      |        |       |      |      |      |
|----------------|-----------------------------------------------|--------|---------------|--------------------|-------|-------|------|--------|-------|------|------|------|
|                |                                               |        |               |                    | BS1   | BS2   | BS3  | BS4    | BS5   | BSJ3 | BSJ4 | BSJ5 |
| Esters         | Benzoic acid, ethyl ester                     | 12.582 | 93-89-0       | 0.056              | ND    | ND    | ND   | 0.08   | ND    | ND   | ND   | ND   |
|                | Methyl salicylate                             | 14.165 | 119-36-8      | 0.040              | 2.76  | 18.58 | 3.54 | 40.26  | 0.29  | ND   | ND   | ND   |
|                | 2-hydroxy-Benzoic acid,<br>ethyl ester        | 14.626 | 118-61-6      | 0.084              | 0.11  | ND    | ND   | ND     | ND    | ND   | ND   | ND   |
|                | Acetic acid, 2-<br>phenylethyl ester          | 14.668 | 103-45-7      | 0.249              | ND    | 0.03  | 0.18 | 1.16   | 0.002 | 0.04 | ND   | ND   |
|                | 2-hydroxy-Benzoic acid,<br>pentyl ester       | 18.257 | 2050-08-<br>0 | 0.001              | 1.18  | 37.39 | 5.89 | 100.00 | 0.42  | ND   | ND   | ND   |
|                | Hexadecanoic acid, ethyl<br>ester             | 22.022 | 628-97-7      | 2.00               | 0.002 | ND    | ND   | ND     | ND    | ND   | ND   | ND   |
|                | Methyl jasmonate                              | 24.200 | 1211-29-<br>6 | 0.07               | 0.06  | ND    | ND   | ND     | ND    | ND   | ND   | ND   |
|                | 2-hydroxy-Benzoic acid,<br>phenylmethyl ester | 33.479 | 118-58-1      | 0.16               | 0.02  | 0.77  | 0.18 | 1.67   | 0.05  | ND   | ND   | ND   |

|          |                              |        |            |       |       |       |       |       |       |       |      |       |
|----------|------------------------------|--------|------------|-------|-------|-------|-------|-------|-------|-------|------|-------|
| Alcohols | 3-methyl-1-Butanol           | 6.348  | 123-51-3   | 0.004 |       | 59.95 |       | 26.45 | 0.00  | ND    | ND   | ND    |
|          | 1-Pentanol                   | 6.349  | 71-41-0    | 0.150 | ND    | ND    | ND    | 0.518 | ND    | ND    | ND   | ND    |
|          | 1-Hexanol                    | 8.365  | 111-27-3   | 0.006 | 5.50  | 17.03 | 0.77  | ND    | 0.37  | ND    | ND   | ND    |
|          | 3-Octanol                    | 8.882  | 589-98-0   | 0.400 | ND    | ND    | 0.007 | ND    | ND    | ND    | ND   | ND    |
|          | 1-Octen-3-ol                 | 9.652  | 3391-86-4  | 0.002 | 4.30  | 76.32 | 5.64  | ND    | 1.77  | ND    | ND   | ND    |
|          | 2-ethyl-1-Hexanol            | 10.163 | 104-76-7   | 0.04  | ND    | ND    | ND    | ND    | 0.03  | ND    | ND   | ND    |
|          | Cycloheptanol                | 10.459 | 502-41-0   | 4.80  | ND    | 0.004 | ND    | ND    | ND    | ND    | ND   | ND    |
|          | 2-Nonanol                    | 10.524 | 628-99-9   | 0.06  | ND    | ND    | ND    | 0.46  | ND    | ND    | ND   | ND    |
|          | 1-Octanol                    | 11.013 | 111-87-5   | 0.13  | 0.02  | 0.27  | ND    | 0.30  | ND    | ND    | ND   | ND    |
|          | (E)-2-Octen-1-ol             | 11.752 | 18409-17-1 | 0.02  | ND    | ND    | 0.14  | ND    | ND    | ND    | ND   | ND    |
|          | Cyclooctyl alcohol           | 11.762 | 696-71-9   | 10.00 | ND    | 0.004 | ND    | ND    | ND    | ND    | ND   | ND    |
|          | 1-Decanol                    | 13.708 | 112-30-1   | 0.78  | ND    | 0.01  | 0.001 | 0.02  | ND    | ND    | ND   | ND    |
|          | Benzyl alcohol               | 15.586 | 100-51-6   | 2.55  | 0.006 | 0.02  | 0.006 | 0.05  | 0.002 | 0.007 | ND   | 0.003 |
|          | alpha-methyl-Benzenemethanol | 16.111 | 98-85-1    | 0.48  | 0.003 | ND    | ND    | ND    | ND    | 0.034 | 0.02 | ND    |

|           |                            |        |            |        |       |        |       |       |       |        |        |        |
|-----------|----------------------------|--------|------------|--------|-------|--------|-------|-------|-------|--------|--------|--------|
|           | 1-Dodecanol                | 16.819 | 112-53-8   | 0.02   | 0.03  | 1.71   | 0.05  | ND    | ND    | ND     | ND     | ND     |
|           | 2,3-Butanediol             | 17.811 | 513-85-9   | 100.00 | ND    | ND     | ND    | ND    | ND    | 0.004  | ND     | 0.001  |
|           | [R-(R*,R*)]-2,3-Butanediol | 18.594 | 24347-58-8 | 100.00 | ND    | ND     | ND    | ND    | ND    | 0.004  | 0.004  | ND     |
| Acids     | Lactic acid                | 17.821 | 50-21-5    | 9.00   | ND    | ND     | ND    | ND    | ND    | ND     | 0.01   | 0.07   |
|           | Propanoic acid             | 17.934 | 79-09-4    | 2.19   | ND    | ND     | ND    | ND    | ND    | 0.007  | ND     | 0.005  |
|           | Octanoic acid              | 18.382 | 124-07-2   | 3.00   | ND    | 0.003  | ND    | 0.005 | 0.001 | ND     | ND     | ND     |
|           | Butanoic acid              | 19.727 | 107-92-6   | 2.40   | ND    | ND     | ND    | ND    | ND    | ND     | 0.008  | ND     |
|           | Nonanoic acid              | 20.218 | 112-05-0   | 4.60   | 0.003 | 0.009  | ND    | 0.02  | 0.001 | ND     | ND     | ND     |
|           | Hydrocinnamic acid         | 32.520 | 501-52-0   | 5.00   | ND    | ND     | ND    | ND    | ND    | 0.004  | ND     | 0.002  |
| Aldehydes | Hexanal                    | 4.437  | 66-25-1    | 0.005  | 3.08  | ND     | ND    | ND    | ND    | ND     | ND     | ND     |
|           | Octanal                    | 7.560  | 124-13-0   | 0.001  | ND    | ND     | ND    | ND    | 15.19 | ND     | ND     | ND     |
|           | Nonanal                    | 8.989  | 124-19-6   | 0.001  | 12.61 | 100.00 | 19.19 | 82.73 | 35.10 | ND     | ND     | ND     |
|           | (E)-2-Octenal              | 9.507  | 2548-87-0  | 0.003  | 2.90  | 10.20  | ND    | ND    | 0.65  | ND     | ND     | ND     |
|           | Acetic acid                | 9.781  | 64-19-7    | 0.01   | ND    | 14.76  | 0.99  | 24.19 | 0.28  | 100.00 | 100.00 | 100.00 |
|           | Decanal                    | 10.364 | 112-31-2   | 0.003  | ND    | 21.35  | 2.97  | 21.94 | 1.71  | ND     | ND     | ND     |



|        |                                   |        |            |        |    |       |      |       |        |       |       |      |
|--------|-----------------------------------|--------|------------|--------|----|-------|------|-------|--------|-------|-------|------|
|        | 4-hydroxy-5-methyl-3(2H)-Furanone | 26.983 | 19322-27-1 | 0.30   | ND | ND    | ND   | ND    | ND     | ND    | ND    | 0.08 |
| Others | Dimethyl ether                    | 3.959  | 115-10-6   | 303.00 | ND | ND    | ND   | ND    | ND     | 0.002 | 0.002 | ND   |
|        | Acetoin                           | 7.555  | 513-86-0   | 0.01   | ND | 30.75 | ND   | ND    | ND     | ND    | 53.29 | 0.34 |
|        | methyl-Pyrazine                   | 11.131 | 109-08-0   | 0.02   | ND | ND    | ND   | ND    | ND     | ND    | ND    | 4.88 |
|        | 2,3-dimethyl-Pyrazine             | 13.067 | 5910-89-4  | 0.80   | ND | ND    | ND   | ND    | ND     | ND    | ND    | 0.02 |
|        | Naphthalene                       | 13.672 | 91-20-3    | 0.006  | ND | 9.55  | 1.24 | 11.14 | 0.89   | ND    | ND    | ND   |
|        | trimethyl-Pyrazine                | 14.437 | 14667-55-1 | 0.35   | ND | ND    | ND   | ND    | ND     | ND    | ND    | 0.04 |
|        | p-Cresol                          | 18.877 | 106-44-5   | 0.004  | ND | 2.23  | ND   | 4.19  | ND     | ND    | ND    | ND   |
|        | Cedrol                            | 19.361 | 83-32-9    | 0.08   | ND | ND    | ND   | ND    | 0.004  | ND    | ND    | ND   |
|        | 2-Methoxy-4-vinylphenol           | 20.978 | 7786-61-0  | 0.01   | ND | ND    | 0.54 | ND    | ND     | ND    | ND    | ND   |
|        | Dibenzofuran                      | 22.436 | 132-64-9   | 0.00   | ND | ND    | ND   | ND    | 100.00 | ND    | ND    | ND   |
|        | m-tert-butyl-Phenol               | 23.102 | 585-34-2   | 0.80   | ND | 0.04  | ND   | ND    | ND     | ND    | ND    | ND   |
|        | Fluorene                          | 24.219 | 120-72-9   | 0.003  | ND | ND    | ND   | ND    | 0.19   | ND    | ND    | ND   |

|  |                         |        |          |      |    |    |    |    |    |      |       |      |
|--|-------------------------|--------|----------|------|----|----|----|----|----|------|-------|------|
|  | Maltol                  | 25.017 | 118-71-8 | 1.24 | ND | ND | ND | ND | ND | ND   | ND    | 0.02 |
|  | 4-ethyl-Phenol          | 27.665 | 123-07-9 | 0.01 | ND | ND | ND | ND | ND | 0.81 | 0.693 | 1.20 |
|  | 2,4-Di-tert-butylphenol | 29.132 | 96-76-4  | 0.50 | ND | ND | ND | ND | ND | ND   | 0.068 | 0.04 |

ND represent not detected
